# Supplementary material for: Outcomes and Critical Factors for Successful Implementation of Organizational Health Literacy Interventions: A Scoping Review
Source: MDPI journal article supplement (doi:10.3390/ijerph182211906), 2021-11-12
Supplement: s1 [file s1]

## S1. Overview detailed search strategy

| Steps                                                                                  | Pubmed                                                                                                                                                                                                                                                                                                        | Scopus                                                                                                                                                  | Cinahl                                                                                                                                                                                                                                                                                                                                                                                   | Psychinfo                                                                                                                                                                                                                                                                                                                                                                                                                                                               |
|----------------------------------------------------------------------------------------|---------------------------------------------------------------------------------------------------------------------------------------------------------------------------------------------------------------------------------------------------------------------------------------------------------------|---------------------------------------------------------------------------------------------------------------------------------------------------------|------------------------------------------------------------------------------------------------------------------------------------------------------------------------------------------------------------------------------------------------------------------------------------------------------------------------------------------------------------------------------------------|-------------------------------------------------------------------------------------------------------------------------------------------------------------------------------------------------------------------------------------------------------------------------------------------------------------------------------------------------------------------------------------------------------------------------------------------------------------------------|
| <b>Step 1.<br/>Terms<br/>relating to<br/>"health<br/>literacy"</b>                     | health literacy[ti] OR health literate[ti] OR "Health Literacy/organization and administration"[Mesh] AND                                                                                                                                                                                                     | TITLE "health literacy" OR "health literate" AND                                                                                                        | MH "Health Literacy/OG" OR TI health literacy OR health literate AND                                                                                                                                                                                                                                                                                                                     | MM "Health Literacy" OR MM "Mental Health Literacy" OR TI health literacy OR health literate AND                                                                                                                                                                                                                                                                                                                                                                        |
| <b>Step 2.<br/>Terms<br/>relating to<br/>"health care<br/>setting"</b>                 | "Community Health Services"[Mesh] OR healthcare system*[tiab] OR "Primary Health Care"[Mesh] OR primary care[tiab] OR "Delivery of Health Care/organization and administration"[Mesh] OR organization*[tiab] OR organisation*[tiab] OR hospital*[tiab] OR institution*[tiab]                                  | TITLE-ABS<br>KEY organization* OR organisation* OR "healthcare system*" OR "primary care" OR "primary health care" OR "primary healthcare" OR hospital* | MH "Primary Health Care" OR MH "Health Care Delivery+/AM" OR MH "Community Health Services" OR MH "Community Mental Health Services+" OR MH "Community Health Nursing+" OR MH "Home Health Care+" OR MH "Preventive Health Care+" OR TI ( organization* OR organisation* OR healthcare system* OR primary care OR primary health care OR primary healthcare OR hospital* OR institution* | DE "Public Health Services" OR DE "Primary Health Care" OR TI ( organization* OR organisation* OR healthcare system* OR primary care or primary health care or primary healthcare OR hospital* OR institution* OR AB organization* OR organisation* OR KW organization* OR organisation* OR healthcare system                                                                                                                                                           |
| <b>Step 3.<br/>Search terms<br/>relating to<br/>"Intervention<br/>characteristics"</b> | OR "Organizational culture"[Mesh] OR "Organizational Innovation"[Mesh] OR "Organization and Administration"[Mesh] OR "Program Development"[Mesh] OR "Professional-Patient Relations"[Mesh] OR "Culturally Competent Care"[Mesh] OR program development[tiab] OR professional patient relation*[tiab] OR cross | OR "program development" OR "professional patient relation*" OR "cross cultural communication" OR "intercultural communication"                         | OR MH "Organizational Culture+" OR MH "Organizational Change" OR MH "Program Development+" OR MH "Professional-Patient Relations+" OR MH "Cultural Competence" OR program development OR professional patient relation* OR cross cultural communication OR intercultural communication                                                                                                   | OR DE "Health Care Delivery" OR DE "Clinical Practice" OR DE "Health Care Access" OR DE "Health Care Costs" OR DE "Health Care Reform" OR DE "Health Care Utilization" OR DE "Managed Care" OR DE "Quality of Care" OR DE "Quality of Services" OR DE "Clinical Practice" OR DE "Case Conceptualization" OR DE "Health Care Access" OR DE "Treatment Barriers" OR DE "Utilization Reviews" OR DE "Health Maintenance Organizations" OR DE "Organizational Change" OR DE |

|                                               |                                                                         |             |             |                                                                                                                                                                                                                                                     |
|-----------------------------------------------|-------------------------------------------------------------------------|-------------|-------------|-----------------------------------------------------------------------------------------------------------------------------------------------------------------------------------------------------------------------------------------------------|
|                                               | cultural communication[tiab]<br>OR intercultural<br>communication[tiab] |             |             | "Organizational Climate" OR DE<br>"Innovation" OR DE "Program<br>Development" OR DE "Therapeutic<br>Processes" OR program<br>development OR professional<br>patient relation* OR cross cultural<br>communication OR intercultural<br>communication) |
| <b>Numbers<br/>retrieved per<br/>database</b> | <b>1511</b>                                                             | <b>1351</b> | <b>1750</b> | <b>808</b>                                                                                                                                                                                                                                          |
